# Supplementary material for: Conjugated Polymer-Based Hydrogel Film for a Fast and Sensitive Detection of Fe(Ⅲ) in Vegetables
Source: MDPI journal article supplement (doi:10.3390/molecules29050925), 2024-02-20
Supplement: s1 [file s1]

Supporting Information

# Conjugated Polymer-Based Hydrogel Film for a Fast and Sensitive Detection of Fe(III) in Vegetables

Xingli Ding <sup>1,†</sup>, Li Sheng <sup>2,†</sup>, Ge Zhang <sup>2</sup>, Min Ji <sup>1,\*</sup> and Yu Li <sup>2,\*</sup>

<sup>1</sup> School of Environmental Science & Engineering, Tianjin University, Tianjin 300350, China; dingxingli@126.com

<sup>2</sup> Jiangxi Provincial Engineering Research Center for Waterborne Coatings, School of Chemistry and Chemical Engineering, Jiangxi Science & Technology Normal University, Nanchang 330013, China; shengli19980817@163.com (L.S.); zhangge20082006@126.com (G.Z.)

\* Correspondence: jimin@tju.edu.cn (M.J.); liliyuly@163.com (Y.L.)

† These authors contributed equally to this work.

**Video S1** The obtained transparent and flexible **PFCA-SA** hydrogel film.

**Video S2** Fluorescence sensing experiment of **PFCA-SA** hydrogel film with and without  $\text{Fe}^{3+}$  solution.

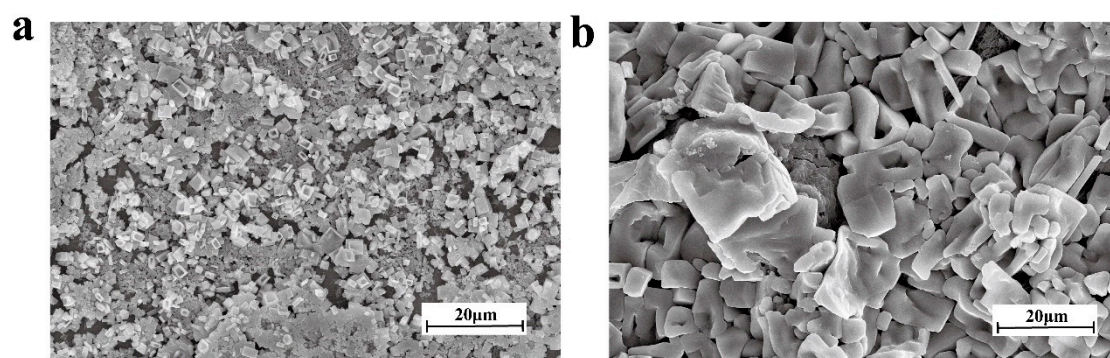

**Figure S1.** SEM of SA (a) and **PFCA-SA** hydrogel film (b).
